# Supplementary material for: Rational improvement of the engineered isobutanol-producing Bacillus subtilis by elementary mode analysis
Source: PubMed Central journal article supplement (PMC3475101; doi:10.1186/1475-2859-11-101), 2012-08-03
Supplement: 1475-2859-11-101-S1.pdf [file 1475-2859-11-101-S1.pdf]

## **Additional File 1 Model reconstruction**

The metabolic reactions of the metabolic model of *Bacillus subtilis* for isobutanol production were derived from the recently published genome-scale metabolic network [1, 2]. The metabolic network of isobutanol-producing *B. subtilis* used for metabolic pathway analysis was constructed as follows. (i) Isobutanol biosynthetic reaction (R130) was introduced in the *B. subtilis* stoichiometric model to convert  $\alpha$ -ketoisovalerate into isobutanol. (ii) The original genome-scale metabolic network was refined to take glucose as the primary substrate via phosphotransferase system (PTS). (iii) For ATP production in the respiratory chain a P/O ratio of 1.33 (for NADH) and 0.89 (for FADH<sub>2</sub>) was assumed [3]. (iv) The biomass composition and cell molecular (Mr=25.03 g/mol, D=0.1 h<sup>-1</sup>) were taken from Dauner and Sauer [4]. (v) Except for the central carbon metabolism, the linear reactions involved in other metabolic subsystems were lumped when necessary. (vi) It is assumed that water, protons and phosphate are ubiquitous in the cells and not limiting.

### **Table S1 Stoichiometric equations of the metabolic model of isobutanol-producing *B. subtilis* BSUL03**

In the reaction equations, GDP, CMP, UDP and UMP were omitted for simplicity [5]. Except for biomass with the unit of “mg”, other units of stoichiometric coefficient are in “mol”. Symbol ‘-->’ indicates irreversible reactions, ‘<==>’ indicates reversible reactions.

| Subsystem           | No. | Reaction                                           | Genes                                                                |
|---------------------|-----|----------------------------------------------------|----------------------------------------------------------------------|
| Transport reactions | R1  | 1 Gluc_ext + 1 PEP --> 1 G6P + 1 Pyr               | ( <i>ptsH</i> or <i>ptsG</i> or <i>ptsI</i> )                        |
|                     | R2  | 1 O2_ext --> 1 O2                                  |                                                                      |
|                     | R3  | 1 N_ext --> 1 N                                    | <i>nrgA</i>                                                          |
|                     | R4  | 1 ATP + 4 NADPH + 1 S_ext --> 1 AMP + 1 S + 4 NADP | ( <i>ybaR</i> or <i>cysP</i> or <i>yvdB</i> )                        |
|                     | R5  | 1 CO2 <==> 1 CO2_ext                               |                                                                      |
|                     | R6  | 1 Lac --> 1 Lac_ext                                | ( <i>yvfH</i> or <i>lctP</i> )                                       |
|                     | R7  | 1 Eth --> 1 Eth_ext                                |                                                                      |
|                     | R8  | 1 Ac --> 1 Ac_ext                                  |                                                                      |
|                     | R9  | 1 Isb --> 1 Isb_ext                                |                                                                      |
|                     | R10 | 1 Val --> 1 Val_ext                                |                                                                      |
|                     | R11 | 1 ATP --> 1 ATP_ext                                |                                                                      |
| Glycolysis          | R12 | 1 G6P <==> 1 F6P                                   | <i>pgi</i>                                                           |
|                     | R13 | 1 F6P + 1 ATP --> 1 F16P + 1 ADP                   | <i>pfkA</i>                                                          |
|                     | R14 | 1 F16P <==> 1 DHAP + 1 G3P                         | ( <i>fbaA</i> or <i>fbaB</i> )                                       |
|                     | R15 | 1 DHAP <==> 1 G3P                                  | <i>tpiA</i>                                                          |
|                     | R16 | 1 G3P + 1 NAD <==> 1 DPG + 1 NADH                  | ( <i>gapA</i> or <i>gapB</i> )                                       |
|                     | R17 | 1 DPG + 1 ADP <==> 1 3PG + 1 ATP                   | <i>pgk</i>                                                           |
|                     | R18 | 1 3PG <==> 1 2PG                                   | <i>pgm</i>                                                           |
|                     | R19 | 1 2PG <==> 1 PEP                                   | <i>eno</i>                                                           |
|                     | R20 | 1 PEP + 1 ADP --> 1 Pyr + 1 ATP                    | <i>pyk</i>                                                           |
|                     | R21 | 1 F16P --> 1 F6P                                   | <i>fbp</i>                                                           |
| TCA cycle           | R22 | 1 Pyr + 1 CoA + 1 NAD --> 1 AcCoA + 1 NADH + 1 CO2 | ( <i>pdhD</i> or ( <i>pdhA</i> and <i>pdhB</i> )<br>or <i>pdhC</i> ) |
|                     | R23 | 1 AcCoA + 1 OxA --> 1 Cit + 1 CoA                  | ( <i>citA</i> or <i>citZ</i> )                                       |
|                     | R24 | 1 Cit <==> 1 ICit                                  | <i>citB</i>                                                          |
|                     | R25 | 1 ICit + 1 NADP <==> 1 alKG + 1 NADPH + 1 CO2      | <i>icd</i>                                                           |

|                       |     |                                                       |                                                                                                      |
|-----------------------|-----|-------------------------------------------------------|------------------------------------------------------------------------------------------------------|
|                       | R26 | 1 alKG + 1 CoA + 1 NAD --> 1 SuccCoA + 1 NADH + 1 CO2 | ( <i>pdhD</i> or <i>odhB</i> or <i>odhA</i> )                                                        |
|                       | R27 | 1 SuccCoA + 1 ADP <==> 1 Succ + 1 ATP + 1 CoA         | ( <i>sucC</i> or <i>sucD</i> )                                                                       |
|                       | R28 | 1 Succ + 1 FAD <==> 1 Fum + 1 FADH <sub>2</sub>       | ( <i>sdhB</i> and <i>sdhA</i> and <i>sdhC</i> )                                                      |
|                       | R29 | 1 Fum <==> 1 Mal                                      | <i>citG</i>                                                                                          |
|                       | R30 | 1 Mal + 1 NAD <==> 1 OxA + 1 NADH                     | <i>mdh</i>                                                                                           |
| PP Pathway            | R31 | 1 G6P + 1 NADP --> 1 PGLac + 1 NADPH                  | <i>zwf</i>                                                                                           |
|                       | R32 | 1 PGLac --> 1 PGLuc                                   | <i>ykgB</i>                                                                                          |
|                       | R33 | 1 PGLuc + 1 NADP --> 1 RL5P + 1 NADPH + 1 CO2         | <i>yqiI</i>                                                                                          |
|                       | R34 | 1 RL5P <==> 1 X5P                                     | <i>ywlF</i>                                                                                          |
|                       | R35 | 1 RL5P <==> 1 R5P                                     | <i>rpe</i>                                                                                           |
|                       | R36 | 1 R5P + 1 X5P <==> 1 G3P + 1 S7P                      | <i>tkt</i>                                                                                           |
|                       | R37 | 1 G3P + 1 S7P <==> 1 F6P + 1 E4P                      | <i>ywjH</i>                                                                                          |
|                       | R38 | 1 E4P + 1 X5P <==> 1 F6P + 1 G3P                      | <i>tkt</i>                                                                                           |
| Pyruvate branches     | R39 | 1 AcCoA + 1 NADH <==> 1 Acald + 1 NAD + 1 CoA         |                                                                                                      |
|                       | R40 | 1 NADH + 1 Acald <==> 1 Eth + 1 NAD                   |                                                                                                      |
|                       | R41 | 1 AcCoA <==> 1 AcP + 1 CoA                            | <i>pta</i>                                                                                           |
|                       | R42 | 1 AcP + 1 ADP <==> 1 ATP + 1 Ac                       | <i>ackA</i>                                                                                          |
|                       | R43 | 1 Pyr + 1 NADH <==> 1 Lac + 1 NAD                     | <i>ldh</i>                                                                                           |
|                       | R44 | 2 ATP + 1 Ac + 1 CoA --> 1 AcCoA + 1 AMP              | <i>acsA</i>                                                                                          |
| Anaplerotic reactions | R45 | 1 ATP + 1 Pyr + 1 CO2 --> 1 OxA + 1 ADP               | <i>pycA</i>                                                                                          |
|                       | R46 | 1 OxA + 1 ATP --> 1 PEP + 1 CO2 + 1 ADP               | <i>pckA</i>                                                                                          |
|                       | R47 | 1 PEP + 1 CO2 + 1 ADP --> 1 OxA + 1 ATP               | <i>pckA</i>                                                                                          |
|                       | R48 | 1 Mal + 1 NADP --> 1 Pyr + 1 NADPH + 1 CO2            | <i>ytsJ</i>                                                                                          |
| Coenzymes and Energy  | R49 | 1 ATP + 1 NADPH + 1 THF <==> 1 MLTHF + 1 NADP + 1 ADP |                                                                                                      |
|                       | R50 | 1 NADH + 1 FAD <==> 1 FADH <sub>2</sub> + 1 NAD       | ( <i>yjlD</i> or <i>yutJ</i> or <i>yumB</i> )                                                        |
|                       | R51 | 1 NADH + 0.5 O2 --> 1.33 ATP + 1 NAD                  | ( ( <i>ctaF</i> and <i>ctaE</i> and <i>ctaD</i> and <i>ctaC</i> ) or ( <i>qcrC</i> and <i>qcrB</i> ) |

---

|                         |     |                                                                                                    |                                                                                                                 |
|-------------------------|-----|----------------------------------------------------------------------------------------------------|-----------------------------------------------------------------------------------------------------------------|
|                         | R52 | 1 FADH <sub>2</sub> + 0.5 O <sub>2</sub> --> 0.89 ATP + 1 FAD                                      | and <i>qcrA</i> ) )                                                                                             |
|                         | R53 | 1 NADH + 1 NADP <==> 1 NADPH + 1 NAD                                                               | ( <i>sdhB</i> and <i>sdhA</i> and <i>sdhC</i> )                                                                 |
|                         | R54 | 1 ATP <==> 1 ADP                                                                                   | <i>yqjI</i>                                                                                                     |
| Amino acid biosynthesis | R55 | 2 PEP + 1 E4P + 1 ATP + 1 NADPH --> 1 Chor + 1 NADP + 1 ADP                                        | ( <i>aroA</i> or <i>aroB</i> or <i>aroC</i> or<br><i>aroD</i> or <i>aroK</i> or <i>aroE</i> or<br><i>aroF</i> ) |
|                         | R56 | 1 R5P + 1 ATP <==> 1 PRPP + 1 AMP                                                                  | <i>prs</i>                                                                                                      |
|                         | R57 | 2 ATP + 1 Gln + 1 CO <sub>2</sub> --> 1 CBP + 1 Glu + 2 ADP                                        | ( ( <i>carA</i> and <i>carB</i> ) or<br>( <i>pyrAB</i> and <i>pyrAA</i> ) )                                     |
|                         | R58 | 1 Pyr + 1 Glu --> 1 alKG + 1 Ala                                                                   | <i>alaT</i>                                                                                                     |
|                         | R59 | 2 Pyr --> 1 Alac + 1 CO <sub>2</sub>                                                               | <i>alsS</i>                                                                                                     |
|                         | R60 | 1 Alac + 1 NADPH <==> 1 DHIV + 1 NADP                                                              | ( <i>ilvH</i> and <i>ilvB</i> )                                                                                 |
|                         | R61 | 1 DHIV <==> 1 3Mob                                                                                 | ( <i>ilvC</i> or <i>ilvD</i> )                                                                                  |
|                         | R62 | 1 3Mob + 1 Glu <==> 1 alKG + 1 Val                                                                 | ( <i>ywaA</i> or <i>ybgE</i> )                                                                                  |
|                         | R63 | 1 3Mob + 1 AcCoA + 1 NAD --> 1 NADH + 1 CO <sub>2</sub> + 1 4Mop + 1 CoA                           | ( <i>leuA</i> or ( <i>leuC</i> and <i>leuD</i> ) or<br><i>leuB</i> )                                            |
|                         | R64 | 1 4Mop + 1 Glu <==> 1 alKG + 1 Leu                                                                 | ( <i>ybgE</i> or <i>ywaA</i> )                                                                                  |
|                         | R65 | 1 ATP + 1 Gln + 1 Asp --> 1 Asn + 1 Glu + 1 AMP                                                    | ( <i>asnB</i> or <i>asnH</i> or <i>asnO</i> )                                                                   |
|                         | R66 | 1 OxA + 1 Glu --> 1 alKG + 1 Asp                                                                   | <i>aspB</i>                                                                                                     |
|                         | R67 | 1 Asp --> 1 Fum + 1 N                                                                              | <i>ansB</i>                                                                                                     |
|                         | R68 | 1 ATP + 1 NADPH + 1 Asp --> 1 AspSAld + 1 NADP + 1 ADP                                             | ( <i>yclM</i> or <i>dapG</i> or <i>lysC</i> or<br><i>asd</i> )                                                  |
|                         | R69 | 1 NADPH + 1 AspSAld --> 1 Hser + 1 NADP                                                            | <i>hom</i>                                                                                                      |
|                         | R70 | 1 26dap_M --> 1 CO <sub>2</sub> + 1 Lys                                                            | <i>lysA</i>                                                                                                     |
|                         | R71 | 1 SuccCoA + 1 MLTHF + 1 HSer + 1 Cys + 1 NADPH --> 1 Pyr + 1 Succ<br>+ 1 N + 1 Met + 1 CoA + 1 THF | ( <i>metA</i> or <i>yjcl</i> or <i>metE</i> or <i>yitJ</i> )                                                    |

---

---

|                         |     |                                                                                                                  |                                                                                                                                                           |
|-------------------------|-----|------------------------------------------------------------------------------------------------------------------|-----------------------------------------------------------------------------------------------------------------------------------------------------------|
|                         | R72 | 1 ATP + 1 HSer --> 1 Thr + 1 ADP                                                                                 | ( <i>thrB</i> or <i>thrC</i> )                                                                                                                            |
|                         | R73 | 1 Pyr + 1 NADPH + 1 Thr --> 1 CO <sub>2</sub> + 1 N + 1 3Mop + 1 NADP                                            | ( <i>ilvA</i> or ( <i>ilvH</i> and <i>ilvB</i> ) or <i>alsS</i> or <i>ilvC</i> or <i>ilvD</i> )                                                           |
|                         | R74 | 1 3Mop + 1 Glu <==> 1 alKG + 1 Ile                                                                               | ( <i>ywaA</i> or <i>ybgE</i> )                                                                                                                            |
|                         | R75 | 1 ATP + 1 PRPP + 1 Gln + 2 NAD --> 1 AICAR + 1 alKG + 2 NADH + 1 His                                             | ( <i>hisG</i> or <i>hisI</i> or <i>hisA</i> or <i>hisB</i> or <i>hisF</i> or <i>hisH</i> or <i>hisC</i> or <i>hisD</i> or <i>hisJ</i> )                   |
|                         | R76 | 1 alKG + 1 NADPH + 1 N --> 1 Glu + 1 NADP                                                                        | ( <i>yrpC</i> or <i>racE</i> )                                                                                                                            |
|                         | R77 | 1 ATP + 1 N + 1 Glu --> 1 Gln + 1 ADP                                                                            | <i>glnA</i>                                                                                                                                               |
|                         | R78 | 1 ATP + 2 NADPH + 1 Glu --> 1 Pro + 1 ADP + 2 NADP                                                               | ( <i>proB</i> or <i>proJ</i> or <i>proA</i> or <i>proG</i> or <i>proI</i> or <i>proH</i> )                                                                |
|                         | R79 | 1 Asp + 2 ATP + 1 CBP + 1 AcCoA + 2 Glu + 1 NADPH --> 1 Ac + 1 Arg + 1 Fum + 1 alKG + 1 AMP                      | ( <i>argJ</i> or <i>argB</i> or <i>argC</i> or <i>argD</i> or <i>ylmB</i> or <i>argF</i> or <i>argG</i> or <i>argH</i> )                                  |
|                         | R80 | 1 Chor + 1 PRPP + 1 Gln + 1 Ser --> 1 G3P + 1 Pyr + 1 CO <sub>2</sub> + 1 Glu + 1 Trp                            | ( ( <i>trpE</i> and <i>pabA</i> ) or <i>trpD</i> or <i>trpF</i> or <i>trpC</i> or ( <i>trpA</i> and <i>trpB</i> ) )                                       |
|                         | R81 | 1 Chor + 1 Glu + 1 NAD --> 1 alKG + 1 NADH + 1 CO <sub>2</sub> + 1 Tyr                                           | ( <i>pheB</i> or <i>aroH</i> or <i>aroA</i> or <i>tyrA</i> or <i>hisC</i> or <i>hisH</i> )                                                                |
|                         | R82 | 1 Chor + 1 Glu --> 1 alKG + 1 CO <sub>2</sub> + 1 Phe                                                            | ( <i>pheB</i> or <i>aroH</i> or <i>aroA</i> or <i>pheA</i> or <i>hisC</i> or <i>hisH</i> )                                                                |
|                         | R83 | 1 3PG + 1 Glu + 1 NAD --> 1 alKG + 1 NADH + 1 Ser                                                                | ( <i>serA</i> or <i>serC</i> or <i>rsbX</i> )                                                                                                             |
|                         | R84 | 1 Ser + 1 THF <==> 1 MLTHF + 1 Gly                                                                               | <i>glyA</i>                                                                                                                                               |
|                         | R85 | 1 AcCoA + 1 S + 1 Ser --> 1 Ac + 1 Cys + 1 CoA                                                                   | ( <i>cysE</i> or <i>cysK</i> )                                                                                                                            |
| Nucleotide biosynthesis | R86 | 5 ATP + 2 Gln + 1 MLTHF + 1 Gly + 1 PRPP + 1 CO <sub>2</sub> + 1 Asp --> 2 Glu + 5 ADP + 1 AICAR + 1 Fum + 1 THF | ( <i>purF</i> or <i>purD</i> or <i>purN</i> or <i>purS</i> or <i>purL</i> or <i>purQ</i> or <i>purM</i> or <i>purK</i> or <i>purE</i> or <i>purC</i> or ) |

---

---

|                    |      |                                                                                                     |                                                                                                                                                                                        |
|--------------------|------|-----------------------------------------------------------------------------------------------------|----------------------------------------------------------------------------------------------------------------------------------------------------------------------------------------|
|                    | R87  | 1 MLTHF + 1 AICAR <==> 1 Fprica                                                                     | <i>purB</i> )                                                                                                                                                                          |
|                    | R88  | 1 Fprica --> 1 IMP                                                                                  | <i>purH</i>                                                                                                                                                                            |
|                    | R89  | 1 Asp + 1 rGTP + 1 IMP --> 1 rATP + 1 Fum + 1 GDP                                                   | <i>purH</i>                                                                                                                                                                            |
|                    | R90  | 3 ATP + 1 Gln + 1 IMP + 1 NAD --> 1 NADH + 1 Glu + 1 rGTP + 1 AMP + 2 ADP                           | ( <i>purA</i> or <i>purB</i> )                                                                                                                                                         |
|                    | R91  | 1 ATP + 1 N + 1 rUTP --> 1 Rctp + 1 ADP                                                             | ( <i>guaB</i> or <i>guaA</i> or <i>gmk</i> or <i>ndk</i> )                                                                                                                             |
|                    | R92  | 2 ATP + 1 Asp + 1 CBP + 0.5 O2 + 1 PRPP --> 1 CO2 + 1 rUTP + 1 CO2 + 2 ADP                          | <i>pyrG</i>                                                                                                                                                                            |
|                    | R93  | 1 NADPH + 1 rATP --> 1 dATP + 1 NADP                                                                | ( <i>pyrB</i> or <i>pyrC</i> or ( <i>pyrD</i> and <i>pyrK</i> ) or <i>pyrF</i> or <i>katA</i> or <i>katE</i> or <i>katX</i> or <i>pyrH</i> or <i>cmk</i> or <i>ndk</i> )               |
|                    | R94  | 1 NADPH + 1 rGTP --> 1 dGTP + 1 NADP                                                                | ( ( <i>nrdE</i> and <i>nrdF</i> and <i>ymaA</i> ) or <i>ndk</i> )                                                                                                                      |
|                    | R95  | 1 NADPH + 1 rCTP --> 1 dCTP + 1 NADP                                                                | ( ( <i>nrdE</i> and <i>nrdF</i> and <i>ymaA</i> ) or <i>ndk</i> )                                                                                                                      |
|                    | R96  | 2 NADPH + 1 MLTHF + 1 rUTP --> 1 dTTP + 1 THF + 2 NADP                                              | ( ( <i>nrdE</i> and <i>nrdF</i> and <i>ymaA</i> ) or <i>ndk</i> or <i>yncF</i> or <i>yosS</i> or <i>thyB</i> or <i>thyA</i> or <i>tmk</i> or <i>ndk</i> )                              |
| Lipid Biosynthesis | R97  | 1 G6P + 1 rUTP --> 1 UDPGlc                                                                         | ( <i>ybbT</i> or <i>gtab</i> )                                                                                                                                                         |
|                    | R98  | 1 DHAP + 1 NADH --> 1 Glyc3P + 1 NAD                                                                | <i>gpsA</i>                                                                                                                                                                            |
|                    | R99  | 6 ATP + 1 3Mob + 5 AcCoA + 10 NADPH + 1 NAD --> 1 fa1CoA + 1 NADH + 5 ADP + 4 CoA + 1 AMP + 10 NADP | ( <i>ywpB</i> or <i>fabF</i> or <i>fabG</i> or <i>fabL</i> or <i>fabHB</i> or <i>fabD</i> or <i>fabI</i> or <i>fabF</i> or <i>fabG</i> or <i>ycsD</i> or <i>fabHA</i> or <i>fabD</i> ) |
|                    | R100 | 7 ATP + 7 AcCoA + 12 NADPH --> 1 TdCoA + 6 ADP + 1 AMP + 12                                         | ( <i>fabF</i> or <i>fabI</i> or <i>fabG</i> or <i>ycsD</i> )                                                                                                                           |

---

---

|      |                                                                                                         |                                                                                                                                                                                                 |
|------|---------------------------------------------------------------------------------------------------------|-------------------------------------------------------------------------------------------------------------------------------------------------------------------------------------------------|
|      | NADP + 6 CoA                                                                                            | or <i>fabHA</i> or <i>fabD</i> or <i>ywpB</i> or<br><i>fabF</i> or <i>fabG</i> or <i>fabL</i> or<br><i>fabHB</i> or <i>galE</i> )                                                               |
| R101 | 6 ATP + 1 4Mop + 5 AcCoA + 10 NADPH + 1 NAD --> 1 fa3CoA + 1<br>NADH + 4 CoA + 5 ADP + 1 AMP + 10 NADP  | ( <i>fabF</i> or <i>ywpB</i> or <i>fabG</i> or<br><i>fabL</i> or <i>fabHB</i> or <i>fabD</i> or <i>fabI</i><br>or <i>fabF</i> or <i>fabG</i> or <i>ycsD</i> or<br><i>fabHA</i> or <i>fabD</i> ) |
| R102 | 6 ATP + 1 3Mop + 5 AcCoA + 10 NADPH + 1 NAD --> 1 fa4CoA + 1<br>NADH + 4 CoA + 5 ADP + 1 AMP + 10 NADP  | ( <i>fabF</i> or <i>ywpB</i> or <i>fabG</i> or<br><i>fabHB</i> or <i>fabL</i> or <i>fabD</i> or<br><i>fabF</i> or <i>fabI</i> or <i>fabG</i> or <i>ycsD</i><br>or <i>fabHA</i> or <i>fabD</i> ) |
| R103 | 7 ATP + 1 3Mob + 6 AcCoA + 12 NADPH + 1 NAD --> 1 fa6CoA + 1<br>NADH + 5 CoA + 6 ADP + 1 AMP + 12 NADP  | ( <i>ywpB</i> or <i>fabF</i> or <i>fabG</i> or<br><i>fabHB</i> or <i>fabL</i> or <i>fabD</i> or<br><i>fabF</i> or <i>fabI</i> or <i>fabG</i> or <i>ycsD</i><br>or <i>fabHA</i> or <i>fabD</i> ) |
| R104 | 8 ATP + 8 AcCoA + 14 NADPH --> 1 PmtCoA + 7 CoA + 14 NADP                                               | ( <i>ywpB</i> or <i>fabF</i> or <i>fabG</i> or<br><i>fabL</i> or <i>fabHB</i> or <i>fabD</i> or <i>fabI</i><br>or <i>fabF</i> or <i>fabG</i> or <i>ycsD</i> or<br><i>fabD</i> )                 |
| R105 | 7 ATP + 1 4Mop + 6 AcCoA + 12 NADPH + 1 NAD --> 1 fa11CoA + 1<br>NADH + 5 CoA + 6 ADP + 1 AMP + 12 NADP | ( <i>fabF</i> or <i>fabI</i> or <i>fabG</i> or <i>ycsD</i><br>or <i>fabHA</i> or <i>fabD</i> or <i>fabF</i> or<br><i>ywpB</i> or <i>fabG</i> or <i>fabHB</i> or<br><i>fabL</i> or <i>fabD</i> ) |
| R106 | 7 ATP + 1 3Mop + 6 AcCoA + 12 NADPH + 1 NAD --> 1 fa12CoA + 1<br>NADH + 5 CoA + 6 ADP + 1 AMP + 12 NADP | ( <i>fabF</i> or <i>fabI</i> or <i>fabG</i> or <i>ycsD</i><br>or <i>fabD</i> or <i>fabF</i> or <i>ywpB</i> or<br><i>fabG</i> or <i>fabHB</i> or <i>fabL</i> or<br><i>fabD</i> )                 |

---

---

|                        |      |                                                                                                                                                          |                                                                                                                                                                                        |
|------------------------|------|----------------------------------------------------------------------------------------------------------------------------------------------------------|----------------------------------------------------------------------------------------------------------------------------------------------------------------------------------------|
|                        | R107 | 9 ATP + 9 AcCoA + 16 NADPH --> 1 StrCoA + 16 NADP + 9 CoA                                                                                                | ( <i>fabF</i> or <i>ywpB</i> or <i>fabG</i> or <i>fabL</i> or <i>fabHB</i> or <i>fabD</i> or <i>fabI</i> or <i>fabF</i> or <i>fabG</i> or <i>ycsD</i> or <i>fabHA</i> or <i>fabD</i> ) |
|                        | R108 | 0.14 fa11CoA + 0.34 fa12CoA + 0.02 fa1CoA + 0.4 fa3CoA + 0.68 fa4CoA + 0.1 fa6CoA + 1 Glyc3P + 0.2 PmtCoA + 0.06 StrCoA + 0.06 TdCoA --> 0.01 12dag3p_BS |                                                                                                                                                                                        |
|                        | R109 | 0.01 12dag3p_BS + 1 rCTP --> 0.01 cdpdag_BS                                                                                                              | <i>cdsA</i>                                                                                                                                                                            |
|                        | R110 | 0.01 12dag3p_BS --> 0.01 12dgr_BS                                                                                                                        |                                                                                                                                                                                        |
|                        | R111 | 0.01 cdpdag_BS + 1 Glyc3P --> 0.01 pgly_BS                                                                                                               | <i>pgsA</i>                                                                                                                                                                            |
|                        | R112 | 0.01 cdpdag_BS + 1 Ser --> 1 CO2 + 0.01 psetha_BS                                                                                                        | <i>pssA</i>                                                                                                                                                                            |
|                        | R113 | 0.01 12dgr_BS + 1 UDPGlc --> 0.01 m12dg_BS                                                                                                               | <i>ugtP</i>                                                                                                                                                                            |
|                        | R114 | 0.01 12dgr_BS + 2 UDPGlc --> 0.01 d12dg_BS                                                                                                               | <i>ugtP</i>                                                                                                                                                                            |
|                        | R115 | 0.01 12dgr_BS + 3 UDPGlc --> 0.01 t12dg_BS                                                                                                               | <i>ugtP</i>                                                                                                                                                                            |
|                        | R116 | 1 ATP + 1 Lys + 0.01 pgly_BS --> 0.01 lysylpgly_BS + 1 AMP                                                                                               | <i>yfiX</i>                                                                                                                                                                            |
|                        | R117 | 0.02 pgly_BS --> 0.01 cdlp_BS                                                                                                                            | ( <i>ywiE</i> or <i>ywjE</i> or <i>ywnE</i> )                                                                                                                                          |
| Cell wall Biosynthesis | R118 | 1 F6P + 1 AcCoA + 1 ATP + 1 Gln --> 1 Glu + 1 UDP_NAG + 1 CoA                                                                                            | ( <i>gcaD</i> or <i>glmS</i> or <i>ybbT</i> )                                                                                                                                          |
|                        | R119 | 1 Pyr + 1 SuccCoA + 1 NADPH + 1 AspSAld + 1 Glu --> 1 alKG + 1 Succ + 1 26dap_M + 1 CoA + 1 NADP                                                         | ( <i>dapA</i> or <i>dapB</i> or <i>ykuQ</i> or <i>patA</i> or <i>ykuR</i> or <i>dapF</i> )                                                                                             |
|                        | R120 | 1 rCTP + 1 Glyc3P --> 1 CDPGLYC                                                                                                                          | <i>tagD</i>                                                                                                                                                                            |
|                        | R121 | 45 CDPGLYC + 2 UDP_NAG --> 1 gtca1_45_BS                                                                                                                 | ( <i>tagA</i> or <i>tagB</i> or <i>tagO</i> or <i>tagG</i> or <i>tagH</i> or <i>tagF</i> )                                                                                             |
|                        | R122 | 45 CDPGLYC + 2 UDP_NAG + 45 UDPGlc --> 1 gtca3_45_BS                                                                                                     | ( <i>tagA</i> or <i>tagB</i> or <i>tagE</i> or <i>tagO</i> or <i>tagG</i> or <i>tagH</i> or <i>tagF</i> )                                                                              |
|                        | R123 | 45 Ala + 45 ATP + 45 CDPGLYC + 2 UDP_NAG --> 1 gtca2_45_BS                                                                                               | ( <i>tagA</i> or <i>dltA</i> or <i>dltB</i> or <i>dltD</i> or <i>tagB</i> or <i>dltC</i> or <i>tagO</i> or )                                                                           |

---



---

|                         |      |                                                                                                                                                                                                                                                                                                                                                                                                                                                                                                                                                                                                                                                                                                                                                                                                                                                                      |                                                              |
|-------------------------|------|----------------------------------------------------------------------------------------------------------------------------------------------------------------------------------------------------------------------------------------------------------------------------------------------------------------------------------------------------------------------------------------------------------------------------------------------------------------------------------------------------------------------------------------------------------------------------------------------------------------------------------------------------------------------------------------------------------------------------------------------------------------------------------------------------------------------------------------------------------------------|--------------------------------------------------------------|
|                         | R124 | 30 UDP_NAG + 30 UDPGlc --> 1 tcam_BS                                                                                                                                                                                                                                                                                                                                                                                                                                                                                                                                                                                                                                                                                                                                                                                                                                 | <i>tagG</i> or <i>tagH</i> or <i>tagF</i> )                  |
|                         | R125 | 2 UDP_NAG + 3 Ala + 5 ATP + 1 26dap_M + 1 Glu + 1 NADPH + 1 PEP<br>--> 1 peptido_BS + 1 NADP + 5 ADP                                                                                                                                                                                                                                                                                                                                                                                                                                                                                                                                                                                                                                                                                                                                                                 | ( <i>ggaA</i> or <i>ggaB</i> )                               |
|                         | R126 | 2400 CDPGLYC + 1 d12dg_BS --> 1 lipo4_24_BS                                                                                                                                                                                                                                                                                                                                                                                                                                                                                                                                                                                                                                                                                                                                                                                                                          |                                                              |
|                         | R127 | 2400 CDPGLYC + 1 d12dg_BS + 2400 UDPGlc --> 1 lipo1_24_BS                                                                                                                                                                                                                                                                                                                                                                                                                                                                                                                                                                                                                                                                                                                                                                                                            |                                                              |
|                         | R128 | 2400 CDPGLYC + 1 d12dg_BS + 2400 UDP_NAG --> 1 lipo2_24_BS                                                                                                                                                                                                                                                                                                                                                                                                                                                                                                                                                                                                                                                                                                                                                                                                           |                                                              |
|                         | R129 | 2400 Ala + 2400 ATP + 2400 CDPGLYC + 1 d12dg_BS --> 1<br>lipo3_24_BS + 2400 AMP                                                                                                                                                                                                                                                                                                                                                                                                                                                                                                                                                                                                                                                                                                                                                                                      | ( <i>dltA</i> or <i>dltB</i> or <i>dltD</i> or <i>dltC</i> ) |
| Isobutanol biosynthesis | R130 | 1 3Mob + 1 NADH --> 1 CO2 + 1 Isb + 1 NAD                                                                                                                                                                                                                                                                                                                                                                                                                                                                                                                                                                                                                                                                                                                                                                                                                            | ( <i>kivd</i> or <i>adh2</i> )                               |
| Biomass                 | R131 | 105 ATP + 0.4083 Gly + 0.2669 Ala + 0.3067 Val + 0.3464 Leu + 0.2699<br>Ile + 0.2162 Ser + 0.1863 Thr + 0.1759 Phe + 0.1108 Tyr + 0.0543 Trp +<br>0.0567 Cys + 0.1133 Met + 0.3231 Lys + 0.193 Arg + 0.0817 His + 0.148<br>Asp + 0.2604 Glu + 0.148 Asn + 0.2603 Gln + 0.1606 Pro + 0.0505 rATP<br>+ 0.0627 rGTP + 0.0389 rCTP + 0.0415 rUTP + 0.0230 dATP + 0.0174<br>dGTP + 0.0174 dCTP + 0.0229 dTTP + 0.000085750 m12dg_BS +<br>0.000110292 d12dg_BS + 0.000065833 t12dg_BS + 0.000004642 cdlp_BS<br>+ 0.000175859 pgly_BS + 0.000022057 lysylpgly_BS + 0.000559509<br>psetha_BS + 0.000006837 lipo1_24_BS + 0.000006123 lipo2_24_BS +<br>0.000018162 lipo3_24_BS + 0.000014676 lipo4_24_BS + 0.10182<br>peptido_BS + 0.00362 gtca1_45_BS + 0.00235 gtca2_45_BS + 0.00182<br>gtca3_45_BS + 0.00311 tcam_BS + 0.0002 NADPH --> Biomass + 0.0002<br>NADP + 105 ADP |                                                              |

---

**Table S2 Abbreviations of metabolites**

| Abbreviation | Metabolite Name                                            | Abbreviation | Metabolite Name                                              |
|--------------|------------------------------------------------------------|--------------|--------------------------------------------------------------|
| 12dag3p_BS   | 1,2-diacyl-sn-glycerol 3-phosphate                         | gtca2_45_BS  | glycerol teichoic acid (n=45), unlinked, D-ala substituted   |
| 12dgr_BS     | 1,2-diacylglycerol                                         | gtca3_45_BS  | glycerol teichoic acid (n=45), unlinked, glucose substituted |
| 26dap_M      | meso-2,6-Diaminoheptanedioate                              | His          | L-Histidine                                                  |
| 2PG          | D-Glycerate 2-phosphate                                    | Hser         | L-Homoserine                                                 |
| 3Mob         | 3-Methyl-2-oxobutanoate                                    | ICit         | Isocitrate                                                   |
| 3Mop         | (S)-3-Methyl-2-oxopentanoate                               | Ile          | L-Isoleucine                                                 |
| 3PG          | 3-Phospho-D-glycerate                                      | IMP          | IMP                                                          |
| 4Mop         | 4-Methyl-2-oxopentanoate                                   | Isb          | isobutanol                                                   |
| Ac           | Acetate                                                    | Isb_ext      | isobutanol (extracellular)                                   |
| Ac_ext       | Acetate (extracellular)                                    | Lac          | L-Lactate                                                    |
| Acald        | Acetaldehyde                                               | Lac_ext      | L-Lactate (extracellular)                                    |
| AcCoA        | Acetyl-CoA                                                 | Leu          | L-Leucine                                                    |
| AcP          | acyl carrier protein                                       | lipo1_24_BS  | lipoteichoic acid (n=24), linked, glucose substituted        |
| ADP          | ADP                                                        | lipo2_24_BS  | lipoteichoic acid (n=24), linked,<br>N-acetyl-D-glucosamine  |
| AICAR        | 5-Amino-1-(5-Phospho-D-ribosyl)imidazole<br>-4-carboxamide | lipo3_24_BS  | lipoteichoic acid (n=24), linked, D-alanine substituted      |
| Ala          | L-Alanine                                                  | lipo4_24_BS  | lipoteichoic acid (n=24), linked, unsubstituted              |
| Alac         | (S)-2-Acetolactate                                         | Lys          | L-Lysine                                                     |
| alKG         | 2-Oxoglutarate                                             | lysylpgly_BS | lysylphosphatidylglycerol                                    |
| AMP          | AMP                                                        | m12dg_BS     | monoglucosyl-1,2 diacylglycerol                              |
| Arg          | L-Arginine                                                 | Mal          | L-Malate                                                     |

---

|           |                                          |            |                                                   |
|-----------|------------------------------------------|------------|---------------------------------------------------|
| Asn       | L-Asparagine                             | Met        | L-Methionine                                      |
| Asp       | L-Aspartate                              | MLTHF      | 5,10-Methylenetetrahydrofolate                    |
| AspSAld   | L-Aspartate 4-semialdehyde               | N          | Ammonium                                          |
| ATP       | ATP                                      | N_ext      | Ammonium (extracellular)                          |
| ATP_ext   | ATP (extracellular)                      | NAD        | Nicotinamide adenine dinucleotide                 |
| CBP       | Carbamoyl phosphate                      | NADH       | Nicotinamide adenine dinucleotide - reduced       |
| cdlp_BS   | cardiolipin ( <i>B. subtilis</i> )       | NADPH      | Nicotinamide adenine dinucleotide phosphate       |
| cdpdag_BS | CDPdiacylglycerol ( <i>B. subtilis</i> ) | O2         | O2                                                |
| CDPGLYC   | CDPglycerol                              | O2_ext     | O2 (extracellular)                                |
| Chor      | Chorismate                               | OxA        | Oxaloacetate                                      |
| Cit       | Citrate                                  | PEP        | Phosphoenolpyruvate                               |
| CO2       | CO2                                      | peptido_BS | Peptidoglycan subunit of <i>Bacillus subtilis</i> |
| CO2_ext   | CO2 (extracellular)                      | PGIac      | 6-phospho-D-glucono-1,5-lactone                   |
| CoA       | Coenzyme A                               | PGIuc      | 6-Phospho-D-gluconate                             |
| Cys       | L-Cysteine                               | pgly_BS    | phosphatidylglycerol ( <i>B. subtilis</i> )       |
| d12dg_BS  | diglucosyl-1,2 diacylglycerol            | Phe        | L-Phenylalanine                                   |
| dATP      | dATP                                     | PmtCoA     | Palmitoyl-CoA (n-C16:0 CoA)                       |
| dCTP      | dCTP                                     | Pro        | L-Proline                                         |
| dGTP      | dGTP                                     | PRPP       | 5-Phospho-alpha-D-ribose 1-diphosphate            |
| DHAP      | Dihydroxyacetone phosphate               | psetha_BS  | phosphatidylethanolamine ( <i>B. subtilis</i> )   |
| DHIV      | (R)-2,3-Dihydroxy-3-methylbutanoate      | Pyr        | Pyruvate                                          |
| DPG       | 3-Phospho-D-glyceroyl phosphate          | R5P        | alpha-D-Ribose 5-phosphate                        |
| dTTP      | dTTP                                     | rATP       | ATP for RNA synthesis                             |
| E4P       | D-Erythrose 4-phosphate                  | rCTP       | CTP for RNA synthesis                             |
| Eth       | Ethanol                                  | rGTP       | GTP for RNA synthesis                             |
| Eth_ext   | Ethanol (extracellular)                  | RL5P       | Ribulose-5-phosphate                              |
| F16P      | D-Fructose 1,6-bisphosphate              | rUTP       | UTP for RNA synthesis                             |

---

|                   |                                                            |          |                                                                   |
|-------------------|------------------------------------------------------------|----------|-------------------------------------------------------------------|
| F6P               | D-Fructose 6-phosphate                                     | S        | Sulfate                                                           |
| fa11CoA           | Iso-C17:0 CoA                                              | S_ext    | Sulfate (extracellular)                                           |
| fa12CoA           | Anteiso-C17:0 CoA                                          | S7P      | Sedoheptulose 7-phosphate                                         |
| fa1CoA            | Iso-C14:0 CoA                                              | Ser      | L-Serine                                                          |
| fa3CoA            | Iso-C15:0 CoA                                              | StrCoA   | Stearyl-CoA (n-C18:0 CoA)                                         |
| fa4CoA            | Anteiso-C15:0 CoA                                          | Succ     | Succinate                                                         |
| fa6CoA            | Iso-C16:0 CoA                                              | SuccCoA  | Succinyl-CoA                                                      |
| FAD               | FAD                                                        | t12dg_BS | triglucoyl-1,2 diacylglycerol                                     |
| FADH <sub>2</sub> | FADH <sub>2</sub>                                          | tcam_BS  | minor teichoic acid (acetylgalactosamine glucose phosphate, n=30) |
| Fprica            | 5-Formamido-1-(5-phospho-D-ribosyl)imidazole-4-carboxamide | TdCoA    | Tetradecanoyl-CoA (n-C14:0 CoA)                                   |
| Fum               | Fumaric acid                                               | THF      | 5,6,7,8-Tetrahydrofolate                                          |
| G3P               | Glyceraldehyde 3-phosphate                                 | Thr      | L-Threonine                                                       |
| G6P               | D-Glucose 6-phosphate                                      | Trp      | L-Tryptophan                                                      |
| GDP               | GDP                                                        | Tyr      | L-Tyrosine                                                        |
| Gln               | L-Glutamine                                                | UDP_NAG  | UDP-N-acetylglucosamine                                           |
| Gluc_ext          | D-Glucose                                                  | UDPGlc   | UDPglucose                                                        |
| Gly               | Glycine                                                    | Val      | L-Valine                                                          |
| Glyc3P            | sn-Glycerol 3-phosphate                                    | Val_ext  | L-Valine (extracellular)                                          |
| gtca1_45_BS       | glycerol teichoic acid (n=45), unlinked, unsubstituted     | X5P      | Xylulose-5-phosphate                                              |

## References

1. Henry C, Zinner J, Cohoon M, Stevens R: **iBsu1103: a new genome-scale metabolic model of *Bacillus subtilis* based on SEED annotations.** *Genome Biol* 2009, **10**:R69.
2. Oh Y-K, Palsson BO, Park SM, Schilling CH, Mahadevan R: **Genome-scale Reconstruction of Metabolic Network in *Bacillus subtilis* Based on High-throughput Phenotyping and Gene Essentiality Data.** *J Biol Chem* 2007, **282**:28791-28799.
3. Sauer U, Bailey JE: **Estimation of P-to-O ratio in *Bacillus subtilis* and its influence on maximum riboflavin yield.** *Biotechnol Bioeng* 1999, **64**:750-754.
4. Dauner M, Sauer U: **Stoichiometric growth model for riboflavin-producing *Bacillus subtilis*.** *Biotechnol Bioeng* 2001, **76**:132-143.
5. Stelling J, Klamt S, Bettenbrock K, Schuster S, Gilles ED: **Metabolic network structure determines key aspects of functionality and regulation.** *Nature* 2002, **420**:190-193.
