# Supplementary material for: Rational improvement of the engineered isobutanol-producing Bacillus subtilis by elementary mode analysis
Source: PubMed Central journal article supplement (PMC3475101; doi:10.1186/1475-2859-11-101), 2012-08-03

**A**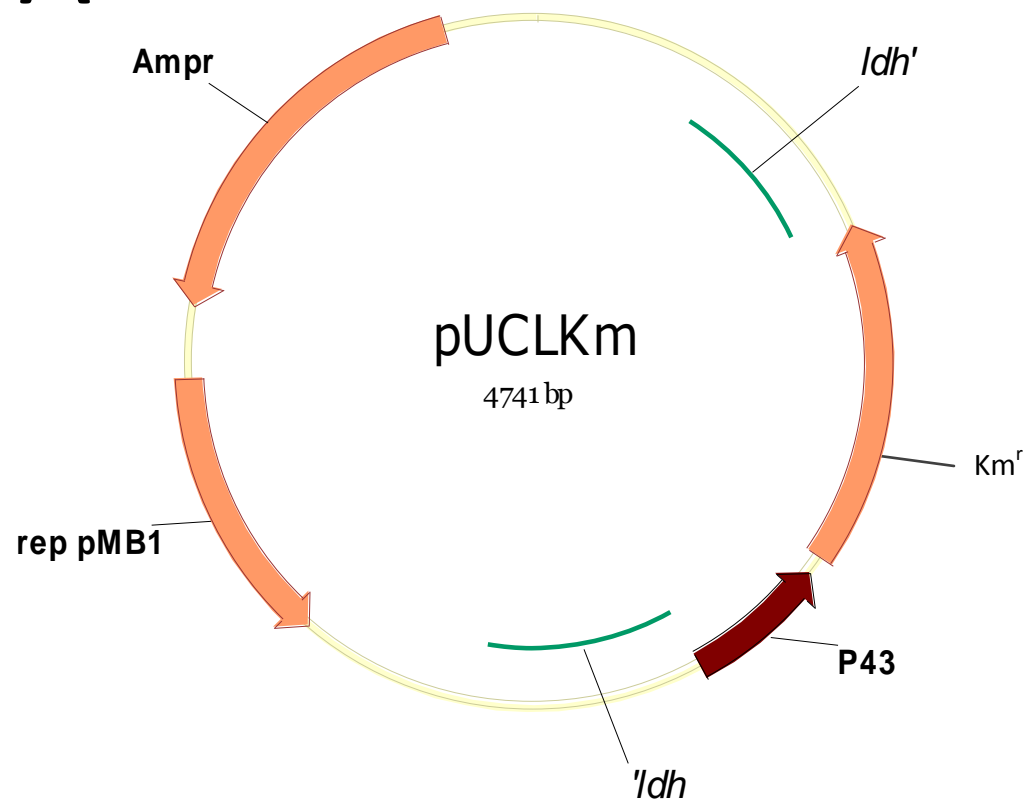**B**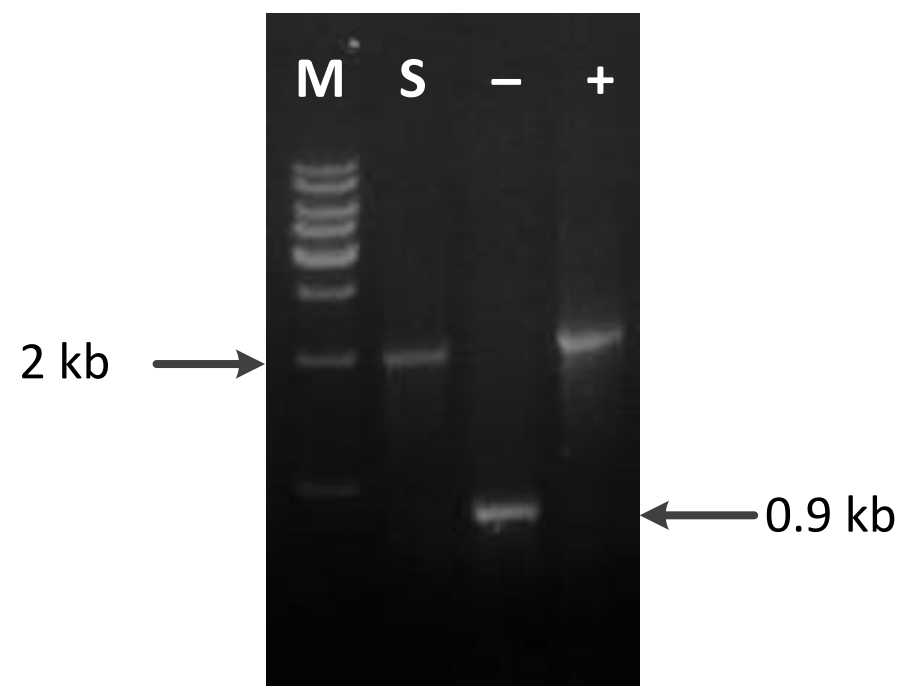**C**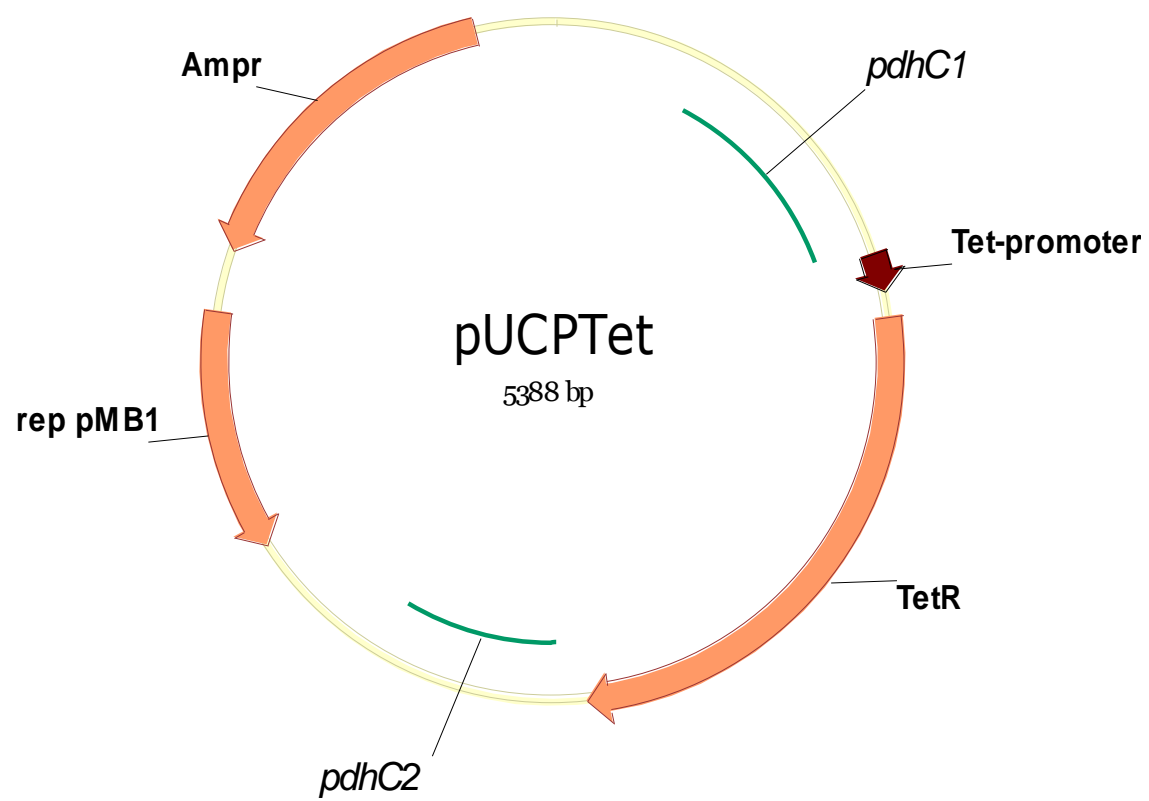**D**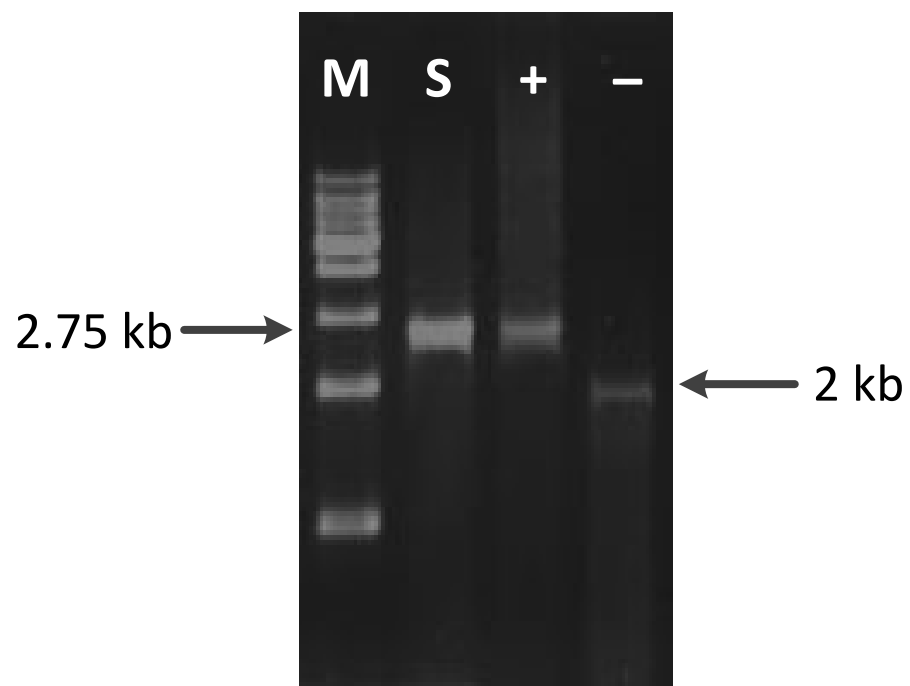

Supplement: 1475-2859-11-101-S2.pdf [file 1475-2859-11-101-S2.pdf]
