# Supplementary material for: Rational improvement of the engineered isobutanol-producing Bacillus subtilis by elementary mode analysis
Source: PubMed Central journal article supplement (PMC3475101; doi:10.1186/1475-2859-11-101), 2012-08-03
Supplement: 1475-2859-11-101-S3.pdf [file 1475-2859-11-101-S3.pdf]

**Table S3 Oligonucleotides used in this study**

Underline stands for the restriction site

| Primer name     | Sequence (5'→3')              |
|-----------------|-------------------------------|
| <i>ldh</i> -F   | ACGACTCTAGAGAGAAACATACCCTGGAA |
| <i>ldh</i> -R   | CATTTCCCGGGTCATTTAAGTTCAG     |
| <i>pdhC1</i> -F | CGGAGAAGCTTGAAGAAGAATACA      |
| <i>pdhC1</i> -R | CATTACTGCAGTCTACCTCGTCGTTA    |
| <i>pdhC2</i> -F | GGTCGGGATCCCTGCTGACACTGAA     |
| <i>pdhC2</i> -R | AGAGAGAATTCATAGCCGCCAGGTC     |
| Tet-F           | CGGTGCTGCAGTTGTTGTATAAGTG     |
| Tet-R           | ATATAGGATCCCAGGTTCGACGGATC    |
